# 1 **Pre-existing cancer cells and induced fibroblasts are key cells for early** 2 **chemoresistance in ovarian cancer**

3  
4 Langyu Gu<sup>1,#</sup>, Shasha He<sup>2,#</sup>, Linxiang Wu<sup>3,#</sup>, Yu Zeng<sup>4</sup>, Yang Zhang<sup>3</sup>, Chenqing  
5 Zheng<sup>1</sup>, Chuling Wu<sup>3</sup>, Huishan Xu<sup>3</sup>, Xiaoyan Zhang<sup>3</sup>, Hongwei Shen<sup>3</sup>, Shuzhong  
6 Yao<sup>3</sup>, Yufeng Ren<sup>2,\*</sup>, Guofen Yang<sup>3,\*</sup>

7  
8 <sup>1</sup> State Key Laboratory for Biocontrol, School of Life Sciences, Sun Yat-sen University,  
9 Guangzhou, 510275, Guangdong, China

10 <sup>2</sup> Department of Radiation Oncology, the First Affiliated Hospital, Sun Yat-sen University,  
11 Guangzhou, 510060, Guangdong, China

12 <sup>3</sup> Department of Gynecology, the First Affiliated Hospital, Sun Yat-sen University,  
13 Guangzhou, 510060, Guangdong, China

14 <sup>4</sup> Department of Nuclear Medicine, the First Affiliated Hospital, Sun Yat-sen University,  
15 Guangzhou, 510060, Guangdong, China

16  
17 # authors contributed equally

18  
19 Correspondence:

20 \*Yufeng Ren: [renyuf@mail.sysu.edu.cn](mailto:renyuf@mail.sysu.edu.cn)

21 \*Guofen Yang: [yangguof@mail.sysu.edu.cn](mailto:yangguof@mail.sysu.edu.cn)

## 22 23 **Running title:**

24 Chemoresistance at the single cell level in ovarian cancer

## 25 **Statement of significance**

26 We have identified key cells and core gene networks for early  
27 chemoresistance in ovarian cancer.

## 28 29 **Conflict of Interest**

30 The authors declare no potential conflicts of interest.

NOTE: This preprint reports new research that has not been certified by peer review and should not be used to guide clinical practice.

31 **Abstract**

32 Chemoresistance has long been a significant but unresolved issue in the treatment  
33 of various cancers, including the most deadly gynecological cancer, the high-  
34 grade serous ovary cancer (HGSOC). In this study, single nuclei transcriptome  
35 analyses were utilized to identify key cells and core networks for chemoresistance  
36 in HGSOC patients with different early responses to platinum-based  
37 chemotherapy at the single-cell level. Biomarkers for chemoresistance were also  
38 screened using bulk transcriptome data from independent cohorts with larger  
39 sample sizes. A total of 62,482 single cells from six samples were analyzed,  
40 revealing that chemoresistant cancer cells (Epithelial cells\_0) pre-existed within  
41 individual patient before treatment. Two network modules formed with hub genes  
42 such as hormone-related genes (ESR1 and AR), insulin-related genes (INSR and  
43 IGF1R), and CTNNB1, were significantly overexpressed in these cells in the  
44 chemoresistant patient. BMP1 and TPM2 could be promise biomarkers in  
45 identifying chemoresistant patients before chemotherapy using bulk  
46 transcriptome data. Additionally, chemotherapy-induced fibroblasts  
47 (Fibroblasts\_01\_after) emerged as key stromal cells for chemoresistance. One  
48 network module containing one subnetwork formed by cholesterol biosynthesis-  
49 related genes and one subnetwork formed by cancer-related genes such as STAT3  
50 and MYC, was significantly overexpressed in these cells in the chemoresistant  
51 patient. Notably, the NAMPT-INSR was the most prioritized ligand-receptor pair  
52 for cells interacting with Fibroblasts\_01\_after cells and Epithelial cells\_0 cells to  
53 drive the up-regulation of their core genes, including IL1R1, MYC and INSR  
54 itself. Our findings deepen the understandings about mechanisms of early  
55 chemoresistance in HGSOC patients.

56

57 **Key words:**

58 chemoresistance, pre-existing cancer cells, induced fibroblasts, NAMPT-INSR,  
59 ovarian cancer, single cell

## 60 **Introduction**

61 Chemoresistance presents a formidable obstacle in the effective treatment  
62 of various cancers, including the high-grade serous ovarian cancer (HGSOC),  
63 which is the most lethal gynecologic malignancy (1). While initial responses to  
64 chemotherapy are favorable for most patients (2), approximately one-third of  
65 patients responding poorly to chemotherapy, with limited further treatment  
66 options available (3). Furthermore, even patients initially responsive well to  
67 chemotherapy may eventually develop chemoresistance, contributing to high  
68 mortality rates in HGSOC (2). Despite decades of clinical application of  
69 chemotherapy, the mechanism behind chemoresistance remains largely unknown.  
70 Although individual chemoresistant targets have been identified using classical  
71 biological experimental methods, their efficacy is usually limited due to the  
72 inherent complexity of biological organisms. We thus need to analyze the  
73 mechanism of chemoresistance at a higher resolution and at the systemic network  
74 level.

75  
76 Cell populations are fundamental to the execution of biological functions  
77 in humans, and chemoresistance represents a selection process favoring cell  
78 populations with adaptive fitness phenotypes. A critical question arises: Do  
79 different responses to chemotherapy pre-exist in patients before treatment, or are  
80 they acquired during treatment? Answering these questions necessitates a single-  
81 cell level analysis, including the differentiation of cancer cells with varying  
82 chemotherapy responses and the interactions among cells in the tumor  
83 microenvironments of patients with different responses. Previous studies in  
84 different cancer types, such as breast cancer, rectal cancer, and oral squamous  
85 cell carcinomas, have revealed diverse mechanisms of chemoresistance, with  
86 either showing pre-existing genetic mutations for chemoresistance (4), or  
87 demonstrating acquired transcriptional profile reprogramming during treatment  
88 (5), or both (6) . These findings underscore the need for specific analyses tailored

89 to each cancer type. One recent study has provided valuable insights into the  
90 mechanisms of chemoresistance in HGSOc, but it focused on metastatic sites (7),  
91 leaving the mechanisms at the primary sites of HGSOc relatively unclear.  
92 Furthermore, the use of platinum-free intervals to characterize chemoresistance  
93 remains controversial and may not directly reflect chemoresistance (8).

94

95 Therefore, in this study, we sought to investigate and compare cellular  
96 composition and corresponding transcriptional profiles at the primary sites before  
97 and after platinum-based chemotherapy in patients with varying responses at the  
98 single-cell level. Our objectives were to address the following questions: Which  
99 cell types are key cells for early chemoresistance? Are the corresponding gene  
100 co-expression networks pre-existing or acquired? What are specific cellular  
101 interactions in the microenvironments in chemoresistant patients? Our findings  
102 will deepen our understandings about mechanisms of chemoresistance, and can  
103 be helpful for finding potential biomarkers and therapeutic targets for early  
104 chemoresistant HGSOc patients.

105

## 106 **Materials and Methods**

### 107 **Sampling and Library Construction**

108 This study was approved by the Ethics Committee for Clinical Research  
109 and Animal Trials of the First Affiliated Hospital of Sun Yat-sen University  
110 (ethics approval No. 2021726). Six fresh paired primary HGSOc samples before  
111 and after chemotherapy were collected from three patients who received  
112 neoadjuvant chemotherapy (NACT) between 2021 and 2022 at the First  
113 Affiliated Hospital, Sun Yat-sen University in Guangzhou, China. Clinical  
114 information can be found in the Supplementary File 1. The chemotherapy  
115 regimen consisted of three cycles of paclitaxel plus carboplatin. Paired samples  
116 were obtained during laparoscopy and interval debulking surgery before and after  
117 chemotherapy. Fresh tissues were immediately frozen in liquid nitrogen and

118 transported by dry ice. Single nuclei transcriptome libraries construction and  
119 sequencing were conducted by Novogene (China) following 10x Genomics  
120 instructions (<https://support.10xgenomics.com>). Briefly, libraries were  
121 constructed using the Chromium Next GEM Chip G Single Cell Kit, 48 rxns (PN-  
122 100020), and Chromium Next GEM Single Cell 3' GEM, Library & Gel Bead  
123 Kit v3.1, 16 rxns PN-1000121. Libraries with PE150 (paired-end reads, 150bp)  
124 were sequenced on an Illumina NovaSeq 6000.

125

## 126 Chemotherapy Response Evaluation

127 All patients underwent baseline 18F-FDG PET/CT before and after  
128 chemotherapy (Figure 1A). 18F-FDG PET/CT was performed after at least 6  
129 hours of fasting and with a glucose level lower than 10 mmol/L. The PET/CT  
130 scan coverage ranged from the top of the head to the mid-thigh. The ordered-  
131 subset expectation maximization iterative reconstruction method was used to  
132 reconstruct the data. The total metabolic tumor volume (tMTV) and total lesion  
133 glycolysis (TLG) were measured and calculated. Based on PERCIST 1.0 (9), we  
134 differentiated patients as partial responses to chemotherapy (PR1 and PR2) and  
135 progress disease (PD) (we named these IDs for this study and they were not used  
136 to identify patients outside the research group) (Figure 1B).

137

## 138 Data Pre-processing

139 Raw data were analyzed with 10x Genomics Cell Ranger 6.1.1. The  
140 GRCh38 Ensembl build genome (refdata-gex-GRCh38-2020-A) was used as the  
141 reference. The filtered feature barcode matrix was used for further data analysis.  
142 The Seurat v4 R package was used for data pre-processing (10). Only genes  
143 expressed in at least three cells, and cells with at least 200 unique Molecular  
144 Identifiers (UMI) were retained. Quality control metrics were plotted for  
145 individual samples and used for filtering cells with aberrantly high UMI, which  
146 could be originated from cell doublets or multiplets. The PercentageFeatureSet()

147 function was used to calculate the percentage of counts originating from  
148 mitochondrial DNA (mtDNA). Low-quality or dead cells with abnormal  
149 mitochondrial contamination were removed. Cell clusters with fewer than 10  
150 cells were also removed. Cell cycle effects were evaluated with  
151 CellCycleScoring() function. Doublets were assessed using the DoubletFinder  
152 v2.0 R package (11).

153

154       Based on the plotting results (Supplementary File 2), quality control was  
155 performed for each sample. For PR1\_before (pre-chemotherapy sample of patient  
156 1 with partial response to chemotherapy), cells with  $200 < \text{UMI} < 7500$ , mtDNA  
157 percentage  $< 8$ , ribosome percentage  $< 4$  were retained, and 984 doublets were  
158 removed. Similarly, for PR1\_after (post-chemotherapy sample of patient 1 with  
159 partial response to chemotherapy), cells with  $200 < \text{UMI} < 5000$ , mtDNA  
160 percentage  $< 2$ , ribosome percentage  $< 1$  were retained, and 831 doublets were  
161 removed. For PR2\_before (pre-chemotherapy sample of patient 2 with partial  
162 response to chemotherapy), cells with  $200 < \text{UMI} < 7500$ , mtDNA counts  $< 6\%$ ,  
163 ribosome percentage  $< 2$  were retained, and 1057 doublets were removed. For  
164 PR2\_after (post-chemotherapy sample of patient 2 with partial response to  
165 chemotherapy), cells with  $200 < \text{UMI} < 4300$ , mtDNA percentage  $< 2.5\%$ ,  
166 ribosome percentage  $< 2$  were retained, and 1119 doublets were removed. For  
167 PD\_before (pre-chemotherapy sample of the chemoresistant patient), cells with  
168  $200 < \text{UMI} < 6000$ , mtDNA percentage  $< 10$ , ribosome percentage  $< 2$  were  
169 retained, and 144 doublets were removed. For PD\_after (post-chemotherapy  
170 sample of the chemoresistant patient), cells with  $200 < \text{UMI} < 6000$ , mtDNA  
171 percentage  $< 1$ , ribosome percentage  $< 2$  were retained, and 367 doublets were  
172 removed.

173

174 Data Integration, Clustering, and Differential Gene Expression Analysis

175 The preprocessed data were used for data integration analysis using Seurat  
176 to correct batch effects among samples (10). 2000 highly variable expressed  
177 genes detected for each sample were used to find anchors for data integration.  
178 Subsequently, the integrated data was scaled, and the principal components were  
179 computed. The top 30 principal components were identified using an elbow plot.  
180 Clustering identification was performed at a proper resolution that can  
181 differentiate major cell types. The UMAP dimensionality reduction was used for  
182 visualization. Differential expressed (DE) genes were identified with a significance  
183 threshold of adjusted  $p$  value  $< 0.05$  and  $\log_2\text{FoldChange} > 0.5$ . KEGG pathways  
184 enrichment analyses were performed using the STRING database ([https://string-](https://string-db.org/)  
185 [db.org/](https://string-db.org/)) (12).

186

#### 187 Malignant Cells Inference

188 Malignant cells were inferred based on genomic copy number variation  
189 (CNV) using CopyKAT v1.1.0 (13). Cells with extensive genome-wide copy  
190 number aberrations (aneuploidy) were considered as malignant tumor cells.  
191 Parameters were set as `ngene.chr=10`, `win.size=25`, `KS.cut=0.1`,  
192 `distance="euclidean"`. Only cells that met the criteria were presented. For the  
193 PR2\_after which contained only a small number of epithelial cells (15 cells), we  
194 assumed that all these epithelial cells were malignant cells, since they all  
195 overexpressed malignance cell markers.

196

#### 197 Gene Co-expression Network Construction

198 hdWGCNA (14) was used to construct high dimensional gene co-  
199 expression network modules for target cell clusters. Genes expressed in at least  
200 5% of cells were used for analyses. Batch effects were corrected during analyses  
201 by setting `group.by` and `group.by.vars` parameters. The number of cells to be  
202 aggregated for metacells construction was 25, and the `max_shared` was set as 10  
203 as default. The TestSoftPowers was used to determine a proper value of the soft

204 power threshold. The implemented AddModuleScore function was applied to  
205 compute hub genes signature scores for each module. Differential module  
206 eigengene analysis was performed between target cell groups. Hub genes  
207 overexpressed in the target cells in the network modules were further used to  
208 construct protein-protein network using the STRING database (12). The  
209 thickness of network edges represents the strength of data support. The minimum  
210 required interaction score was set as 0.7 (high confidence). Only genes with  
211 interaction degrees  $>1$  were presented.

212

### 213 Survival Analyses

214 Survival analyses were conducted using three publicly available bulk  
215 transcriptome datasets with clinical information, including GSE102073 (n=70),  
216 PRJNA866991 (n=41), and GSE32062 (n=260). Kaplan-Meier (K-M) survival  
217 curves were constructed using the survival 3.5 R package (15).

218

### 219 Bulk Transcriptome Analyses

220 For the GSE102073 cohort, the normalized gene expression matrix was  
221 obtained directly from the GEO database. For the PRJNA866991 cohort, raw  
222 reads were retrieved from the NCBI database and aligned to the GRCh38  
223 Ensembl build human genome using HISAT2 v2.1.0 (16). SAMTOOLS v1.7  
224 (17,18) was utilized to convert sam files to bam files, sort and index bam files,  
225 and obtain the final counts. Featurecounts v2.0.4 (19) was used to obtain the  
226 counts at the gene level. The DESeq2 v1.38.3 (20) was employed to normalize  
227 the count files and generate the final expression matrix. For the GSE32062 cohort,  
228 CEL files were first downloaded from the GEO database. The affy v1.74 R  
229 package (21) was used to process the CEL files, and rma was applied for  
230 normalization. The hgu133plus.db was used to extract the gene expression matrix  
231 at the gene level.

232



## 233 Cell-Cell Interaction Analyses

234 Nichenetr (22) was used to identify prioritized ligand-receptor-target genes  
235 involved in the interactions from senders to receivers under different conditions.  
236 All genes expressed in at least 10% of receiving cells were used as the  
237 background geneset.

238

## 239 RNA Velocity Analyses

240 RNA velocity (the change in mRNA abundance calculated by relating the  
241 abundance of unspliced and spliced mRNA) was estimated using Scvelo (23)  
242 following the instructions (<https://scvelo.readthedocs.io/en/stable/>). The  
243 stochastic model was chosen to account for stochasticity in gene expression, and  
244 the combination of velocities across genes was used to estimate the future state  
245 of individual cells.

246

## 247 Data Availability

248 All data produced in the present study are available upon reasonable  
249 request to the authors.

250

## 251 Results

### 252 Cell atlas before and after chemotherapy in patients with different responses

253 We collected six samples at primary ovary sites from three HGSOC  
254 patients paired before and after chemotherapy. The responses to chemotherapy  
255 were evaluated using PET/CT (Figure 1A and Figure 1B). The results of tMTV  
256 and TLG of each patient before and after chemotherapy were given in Figure 1B.  
257 Based on PERCIST 1.0 (9), we differentiated patients as partial responses to  
258 chemotherapy (PR1 and PR2) and progress disease (PD). After quality control, a  
259 total of 62482 single cells were grouped into nine major clusters, including 12668  
260 epithelial cells (KRT19<sup>+</sup>), 41522 fibroblasts (DCN<sup>+</sup>), 1825 T cells (CD96<sup>+</sup>), 4850  
261 Macrophages (CD163<sup>+</sup>), 1120 Endothelial cells (VWF<sup>+</sup>), 75 Lymphatic

262 endothelial cells (FLT4<sup>+</sup>), 213 B cells (MZB1<sup>+</sup>), 43 Schwann cells (LGI4<sup>+</sup>), and  
263 166 Ciliated-secretory intermediate cells (CFAP54<sup>+</sup>FOXJ1<sup>+</sup>PAX8<sup>+</sup>) (24,25)  
264 (Figure 1C). Malignant cells inference revealed that malignant cells were mainly  
265 epithelial cells (Figure 1D), which is consistent with the pathological  
266 characteristics of HGSOC as an epithelial cancer. A small portion of ciliated-  
267 secretory intermediate cells were also identified as malignant cells, which can be  
268 explained since they were assumed to be the main origin of HGSOC (24,25).  
269 Expression profiles of corresponding markers in each cell type were provided in  
270 Figure 1E. The cell numbers and ratios in each major cell cluster from individual  
271 patients were also presented in Figure 1F. The distribution of major cell clusters  
272 in each sample among patients before and after chemotherapy were illustrated in  
273 Figure 1G.

274

275

276

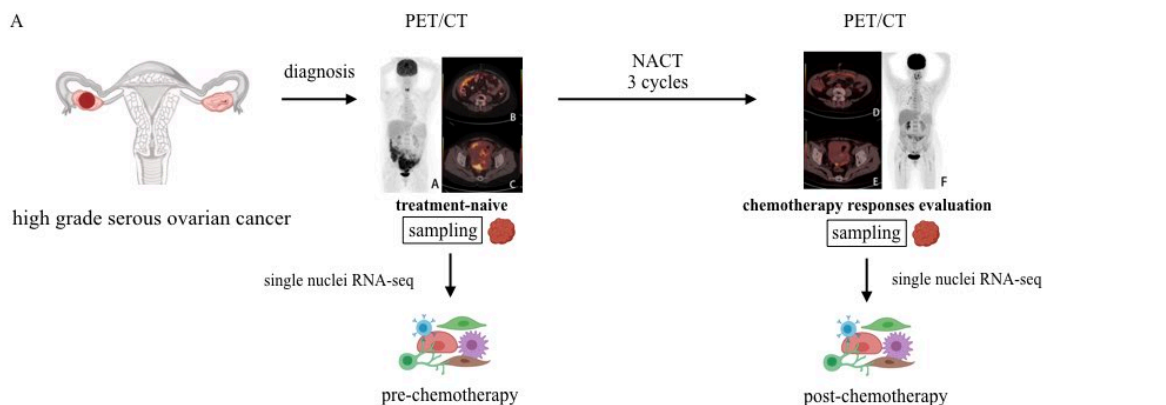

**B**

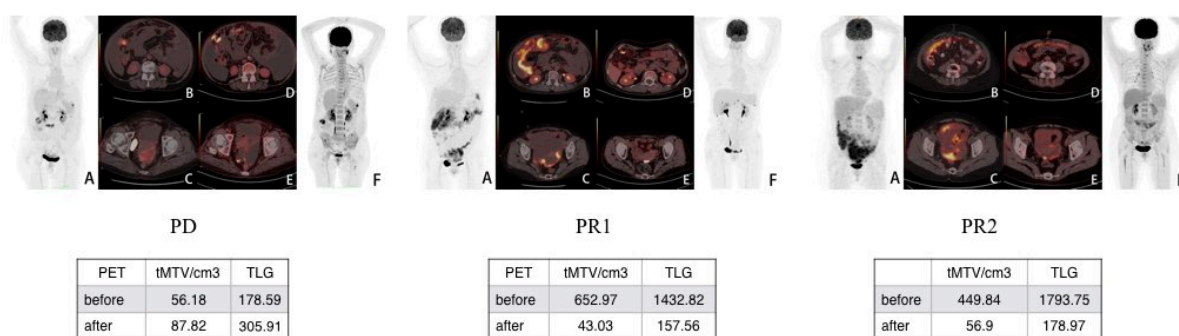

277

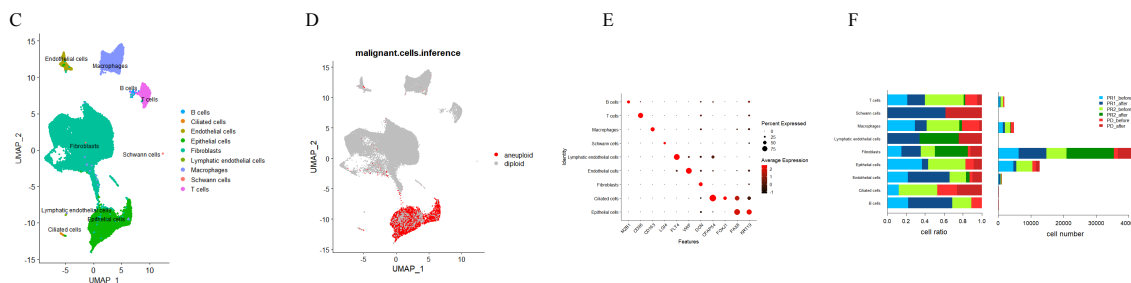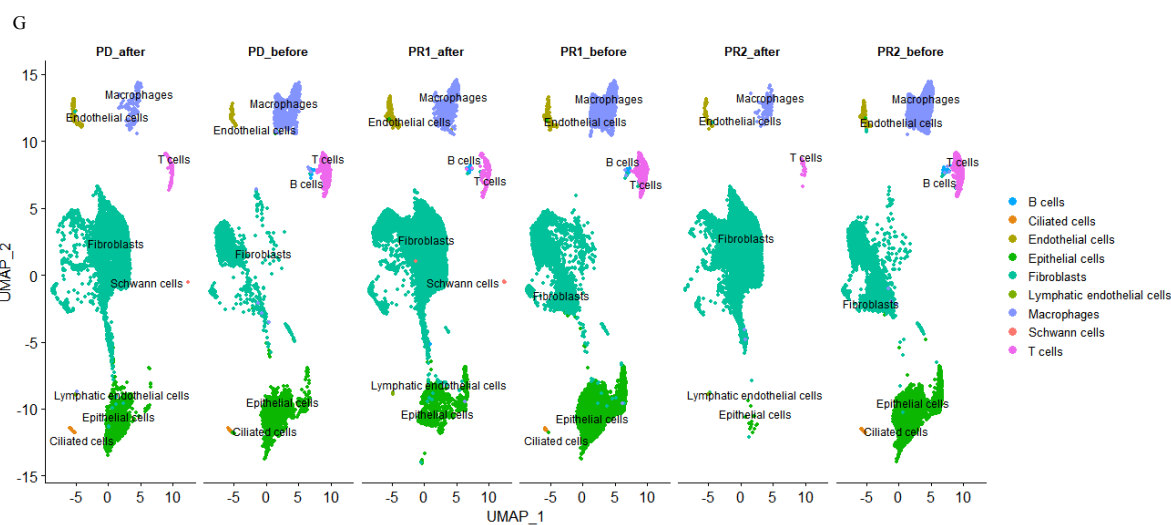

278

279 **Figure 1** Schematic of sampling and analysis results. (A) Schematic of sampling. Fresh paired primary samples  
280 before and after chemotherapy were collected from three patients who received neoadjuvant chemotherapy  
281 (NACT). The chemotherapy regimen consisted of three cycles of paclitaxel plus carboplatin. PET/CT was used  
282 to evaluate chemotherapy responses before and after chemotherapy for each patient. Paired samples were collected  
283 during laparoscopy and interval debulking surgery before and after chemotherapy. Single nuclei transcriptome  
284 libraries constructions were conducted following 10 x Genomics instructions. (B) Chemotherapy responses  
285 evaluation. tMTV (total metabolic tumor volume) and TLG (total lesion glycolysis) were used to evaluate  
286 chemotherapy responses. PR1 represents patient 1 with a partial response to chemotherapy, PR2 represents patient  
287 2 with a partial response to chemotherapy, and PD represents progressive disease (chemoresistant patient). (C)  
288 The UMAP plot of cell atlas of integrated samples showing major cell clusters. (D) Malignant cells inference.  
289 Aneuploid cells (malignant cells) and diploid cells (non-malignant cells) were identified. (E) The dot plot of  
290 marker genes expression for each major cell cluster. (F) Cell numbers and cell ratios of each major cell cluster in  
291 each individual sample. (G) The UMAP plot of cell atlas showing major cell clusters in each individual sample  
292 among patients before and after chemotherapy. PD\_after represents the post-chemotherapy sample of the  
293 chemoresistant patient, PD\_before represents the pre-chemotherapy sample of the chemoresistant patient,  
294 PR1\_after represents the post-chemotherapy sample of patient 1 with partial response to chemotherapy,  
295 PR1\_before represents the pre-chemotherapy sample of patient 1 with partial response to chemotherapy,  
296 PR2\_after represents the post-chemotherapy sample of patient 2 with partial response to chemotherapy, and  
297 PR2\_before represents the pre-chemotherapy sample of patient 2 with partial response to chemotherapy.

298

## 299 **Chemoresistant cancer cells were pre-existing in the PD patient**

300

301 Five subclusters of epithelial cells were identified in total (Figure 2A and  
302 2B). No genes were specifically overexpressed in Epithelial cells\_0, indicating  
303 that this subcluster represented a common cancer cell type. Epithelial cells\_1  
304 specifically overexpressed MKI67 and enriched cell proliferation-related  
305 pathways, such as homologous recombination, DNA replication, and the cell  
306 cycle. Epithelial cells\_2 specifically overexpressed the hypoxia-related gene  
307 PFKFB. Epithelial cells\_3 specifically overexpressed DOCK8 and PTPRC, and  
308 enriched immune response-related pathways, such as the B cell receptor and T  
309 cell receptor pathways. Epithelial cells\_4, which only appeared in the partial  
310 response after chemotherapy, specifically overexpressed DACH2 and OVGPI1,  
311 and enriched cancer-related pathways (Figure 2C, 2D).

312

313 Cell proportion analysis showed that Epithelial cells\_0 cells were highly  
314 enriched in the PD\_after, indicating its chemoresistant character (Figure 2E and  
315 2F). DE genes retrieved from comparisons among samples after chemotherapy  
316 for each subcluster also revealed that Epithelial cells\_0 cells enriched many  
317 cancer-related pathways in the PD\_after, such as the Wnt signaling pathway, the  
318 MAPK signaling pathway, the insulin signaling pathway, the cellular senescence  
319 pathway, and the longevity regulating pathway (Figure 2G). In contrast, although  
320 other subclusters also remained after chemotherapy in the PD\_after, their  
321 proportions were largely reduced, and no cancer-related pathways were enriched,  
322 indicating their fragility to chemotherapy. Thus, we proposed that Epithelial  
323 cells\_0 cells were the key cancer cells for early chemotherapy responses. It is  
324 worth noting that clustering analysis using cell average transcriptional profiles  
325 clustered Epithelial cells\_0 cells based on individual patient ID rather than  
326 treatment condition (before or after chemotherapy) (Figure 2H), indicating that  
327 transcriptional profiles for chemotherapy responses were largely pre-existing in  
328 Epithelial cells\_0 cells in individual patients before chemotherapy.

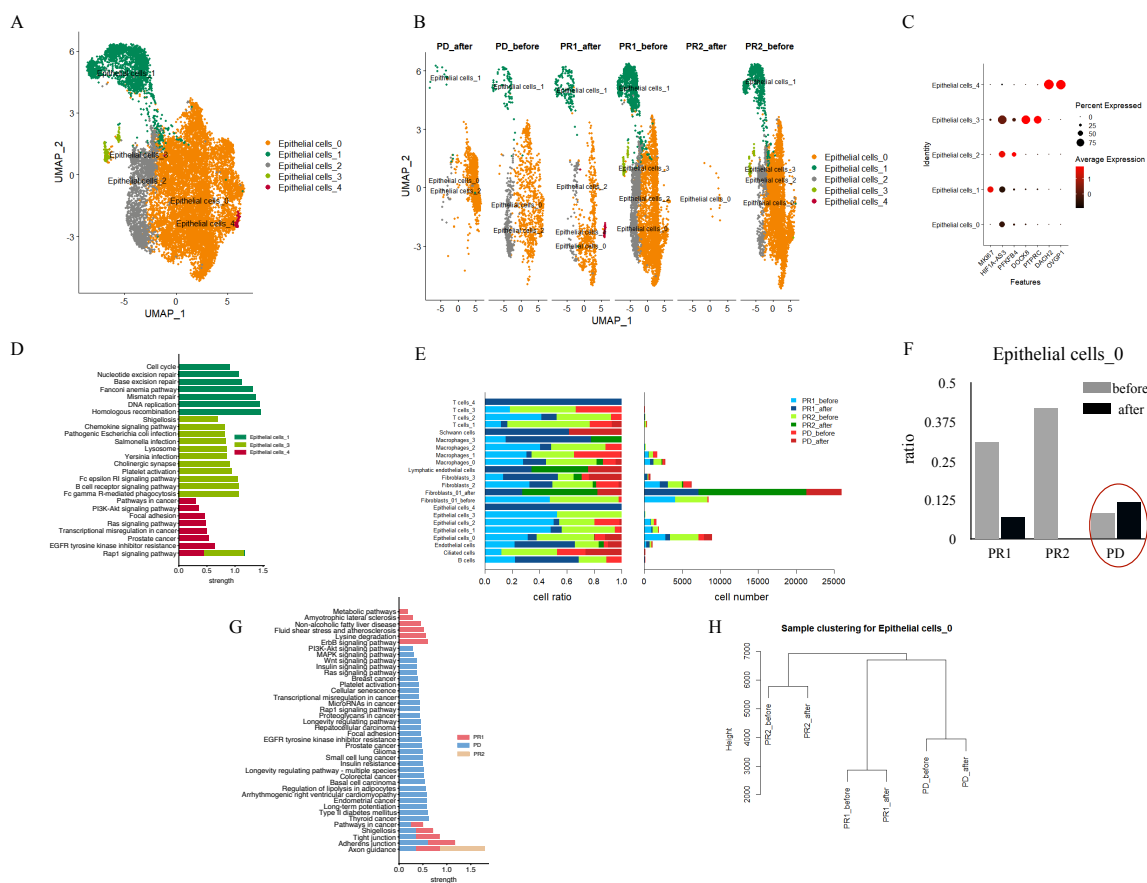

329

330 **Figure 2** (A) The UMAP plot of cell atlas for five epithelial cells subclusters. (B) The UMAP plot of cell atlas  
 331 showing five epithelial cells subclusters in each individual sample among patients before and after chemotherapy.  
 332 PD\_after represents the post-chemotherapy sample of the chemoresistant patient, PD\_before represents the pre-  
 333 chemotherapy sample of the chemoresistant patient, PR1\_after represents the post-chemotherapy sample of  
 334 patient 1 with a partial response to chemotherapy, PR1\_before represents the pre-chemotherapy sample of patient  
 335 1 with a partial response to chemotherapy, PR2\_after represents the post-chemotherapy sample of patient 2 with  
 336 a partial response to chemotherapy, PR2\_before represents the pre-chemotherapy sample of patient 2 with a partial  
 337 response to chemotherapy. (C) The dot plot of marker genes expression for epithelial cells subclusters. (D) KEGG  
 338 pathway enrichment for epithelial cells subclusters. (E) Cell numbers and cell ratios of cell subclusters in each  
 339 individual sample. (F) Cell ratio comparisons of the Epithelial cells\_0 subcluster between samples before and  
 340 after chemotherapy in each patient. (G) KEGG pathway enrichment for the Epithelial cells\_0 subcluster among  
 341 samples after chemotherapy. (H) Sample clustering using cell average transcriptional profiles clustered Epithelial  
 342 cells\_0 cells based on individual patient ID rather than treatment condition (before or after chemotherapy).  
 343

344 Gene co-expression networks construction further supported the above  
 345 results. We identified six co-expression modules for Epithelial cells\_0 cells in  
 346 total. Module eigengene (ME) represents the first principal component of the  
 347 gene expression matrix comprising each module, and was thus used to summarize

348 the gene expression profile of the entire module. Figure 3A presented the  
349 summarization of the expression of each module obtained by calculating gene  
350 signature scores from MEs for the top 25 hub genes for each module. To correct  
351 batch effects, harmony batch correction was applied to produce harmonized MEs  
352 (hMEs) (Figure 3B). We can see that, again, pre- and post- chemotherapy  
353 samples from the same patient expressed similar modules (Figure 3B). For  
354 example, the PD patient overexpressed M3 and M4 modules both before and after  
355 chemotherapy. Differential module eigengene analysis revealed that no module  
356 was significantly overexpressed in the post-chemotherapy sample when  
357 compared to the pre-chemotherapy sample from the same patient. For example,  
358 although the adjust  $p$  value of M3 in the PD\_after was significant when compared  
359 to PD\_before, its foldchange was small (Figure 3C left). Although the adjust  $p$   
360 values of M3 and M4 modules were significant in the PR1\_after when compared  
361 to the ones in the PR1\_before, they actually expressed little in these samples  
362 (Figure 3C middle). This can be also applied to M4 and M6 modules in the PR2  
363 patient (Figure 3C right). These results confirmed again that the transcriptional  
364 profiles for different chemotherapy responses were pre-existing in cancer cells  
365 before chemotherapy.

366

367 Notably, when comparing Epithelial cells\_0 cells among samples after  
368 chemotherapy, M3 and M4 modules were significantly overexpressed in  
369 Epithelial cells\_0 cells in the PD\_after when compared to the ones in either  
370 PR1\_after or PR2\_after (Figure 3D), indicating the chemoresistant characters of  
371 these two modules. Further protein-protein co-expression networks using these  
372 module genes overexpressed in the PD\_after showed that insulin-related  
373 receptors (INSR and IGF1R), hormone receptor (AR), NCOR2, and SMAD2  
374 formed a tight connective network in module M3, and a tight network with  
375 CTNNB1 and ESR1 as the core hubs in module M4 (Figure 3E).

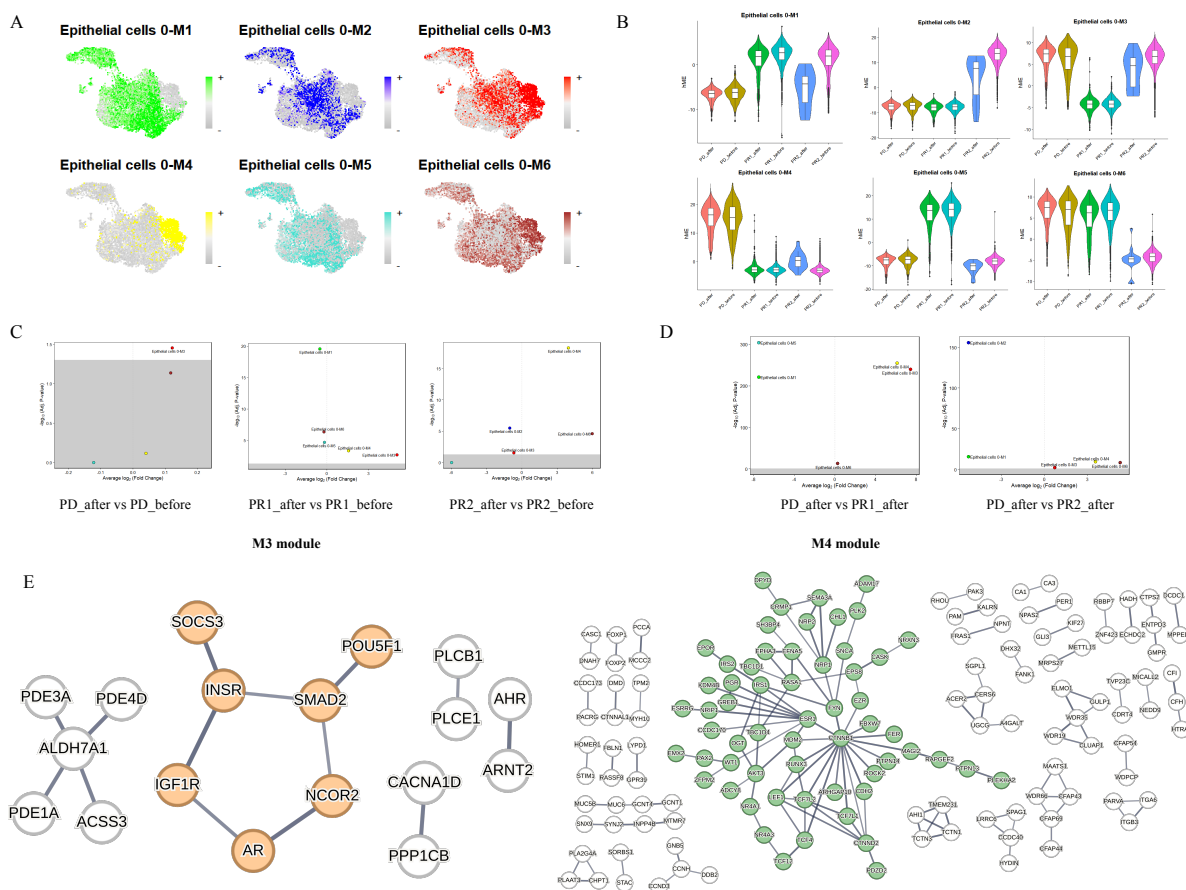

376

377 **Figure 3** Gene co-expression networks construction and comparisons for Epithelial cells\_0. (A) The UMAP plots  
 378 of the hub gene signature score for each module constructed for Epithelial cells\_0. (B) Violin plots of the  
 379 harmonized module eigengenes (hMEs) in each sample for each module. (C) Differential module eigengene  
 380 comparisons between post- and pre-samples within each individual patient. (D) Differential module eigengene  
 381 comparisons between the PD\_after and the PR1\_after or the PR2\_after, respectively. (E) Co-expression networks  
 382 visualization of Module 3 and Module 4. PD\_after: post-chemotherapy sample of the chemoresistant patient.  
 383 PD\_before: pre-chemotherapy sample of the chemoresistant patient. PR1\_after: post-chemotherapy sample of the  
 384 patient 1 with partial response to chemotherapy. PR1\_before: pre-chemotherapy of the patient 1 with partial  
 385 response to chemotherapy. PR2\_after: post-chemotherapy sample of the patient 2 with partial response to  
 386 chemotherapy. PR2\_before: pre-chemotherapy of the patient 2 with partial response to chemotherapy.

387

388 The presence of pre-existing chemoresistance transcriptional profiles in  
 389 cancer cells before chemotherapy lays the foundation for the search for relevant  
 390 pre-treatment biomarkers. Survival analyses were thus conducted using publicly  
 391 available bulk transcriptome data with progression-free survival (PFS)  
 392 information, representing the time to first recurrence after chemotherapy. These  
 393 analyses were performed using datasets from three independent cohorts:  
 394 PRJNA866991 (n=41), GSE32062 (n=260), and GSE102073 (n=70). It is



395 important to note that these cohorts utilized bulk transcriptome data, where gene  
 396 expression represents the expression level of the entire sample rather than a  
 397 specific cell group. Additionally, these data were only retrieved from pre-  
 398 chemotherapy conditions. We thus first identified DE genes that were  
 399 significantly overexpressed in the whole sample of PD\_before when compared to  
 400 PR1\_before and PR2\_before. Subsequent survival analyses of these genes  
 401 revealed that only two genes, BMP1 and TPM2, were significantly associated  
 402 with low PFS across all three cohorts (Figure 4A). Both genes were also  
 403 significantly overexpressed in Epithelial cells\_0 cells in the PD patient when  
 404 compared to samples of PR patients (Figure 4B).

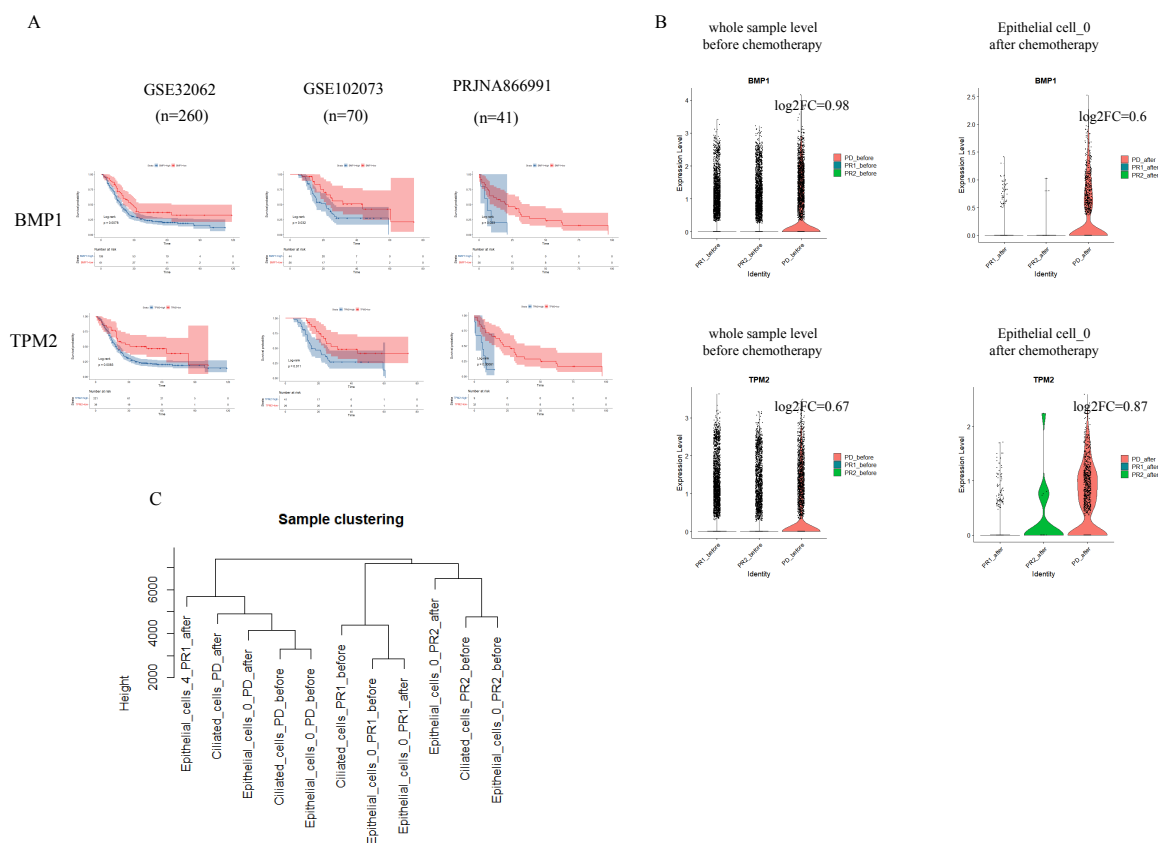

405 **Figure 4** (A) Kaplan-Meier survival curves on progression-free survival (PFS) for genes BMP1 and TPM2 from  
 406 three independent cohorts. (B) Violin plots showing gene expression level patterns among samples at the sample level  
 407 before chemotherapy and at the Epithelial cells\_0 level after chemotherapy. (C) Sample clustering revealing that  
 408 the expression profiles of Ciliated-secretory intermediate cells were clustered based on individual patients rather  
 409 than treatment condition.

411

412 We also investigated chemoresistant genes in ciliated-secretory  
413 intermediate cells since they were also remained in the PD\_after, and are assumed  
414 to be the main origin of the high-grade serous ovarian carcinoma (HGSOC)  
415 (24,25). Similar to Epithelial cells\_0 cells, sample clustering also revealed that  
416 the expression profiles of ciliated-secretory intermediate cells were clustered  
417 based on individual patients rather than treatment condition (Figure 4C). There  
418 were only 17 genes overexpressed in Epithelial cells\_0 cells when compared to  
419 ciliated-secretory intermediate cells in the PD\_after with no pathways enriched,  
420 indicating their similar transcriptional profiles. This indicated that ciliated-  
421 secretory intermediate cells in the PD\_after could also be chemoresistant, and the  
422 corresponding transcriptional profiles were also pre-existing in individual  
423 patients before treatment.

424

### 425 **The induced fibroblasts after chemotherapy are key cells for** 426 **chemoresistance**

427

428 We initially identified four fibroblasts subclusters (Figure 5A).  
429 Fibroblasts\_0 occupied a large proportion in the tumor microenvironment after  
430 chemotherapy, indicating its association with chemotherapy. Notably,  
431 Fibroblasts\_0 was difficult to be clearly separated from Fibroblasts\_1 in the  
432 UMAP plot with different resolutions, indicating that Fibroblasts\_0 cells were  
433 induced from Fibroblasts\_1 during the treatment. Transcriptional dynamics  
434 analysis also revealed that the transcriptional dynamics direction of Fibroblasts\_1  
435 before chemotherapy changed to the same direction of Fibroblasts\_0 after  
436 chemotherapy, except for a small portion of cells whose direction was more  
437 inclined towards the pre-treatment direction. However, no DE gene was  
438 specifically found to be overexpressed in this part. Additionally, when we  
439 conducted sampling clustering using cellular average transcriptional profiles, we  
440 found that unlike other subclusters, Fibroblasts\_0 was always clustered together

441 with Fibroblasts\_1 in each sample (Figure 5B and 5C). We thus treated  
442 Fibroblasts\_0 and Fibroblasts\_1 as one cluster named Fibroblasts\_01, and  
443 differentiated pre-chemotherapy and post-chemotherapy clusters into  
444 Fibroblasts\_01\_before and Fibroblasts\_01\_after (Figure 5D, Figure 5E and 5F).

445  
446 All identified fibroblasts were epithelial-mesenchymal transition (EMT)  
447 fibroblasts, as evidenced by their high expression of corresponding markers VIM,  
448 ZEB1, and ZEB2 (Figure 5G). Although no genes were specifically  
449 overexpressed in Fibroblasts\_01\_before, several genes were specifically  
450 overexpressed in Fibroblasts\_01\_after after chemotherapy. The top five  
451 overexpressed DE genes for Fibroblasts\_01\_after in the PD\_after were SGCZ,  
452 ACSM3, STAR, ESYT2, and INSR. Three pathways were enriched for this  
453 subcluster, including ovarian steroidogenesis, longevity regulating pathway-  
454 multiple species, and FoxO signaling pathway. The corresponding genes were  
455 IGF1R, INSR, STAR, FOXO1, and SGK1. Additionally, Fibroblasts\_2 (FAP<sup>+</sup>  
456 COL8A1<sup>+</sup> RUNX2<sup>+</sup>) specifically overexpressed FAP, COL8A1, and RUNX2,  
457 and enrichment in pathways related to ovarian steroidogenesis, regulation of actin  
458 cytoskeleton, AGE-RAGE signaling pathway in diabetic complications, and  
459 amoebiasis. Fibroblasts\_3 (MCAM<sup>+</sup>) specifically overexpressed MCAM and  
460 enriched pathways such as pathways in cancer, cortisol synthesis and secretion,  
461 vascular smooth muscle contraction, and cGMP-PKG signaling pathway (Figure  
462 5H and 5I).

463  
464 The sample clustering tree using average transcriptional profiles showed  
465 that all subclusters were clustered by treatment condition rather than patient IDs  
466 (Figure 5D), signifying that treatment condition played a critical role in  
467 fibroblasts among patients. When examining the enrichment of overexpressed  
468 genes in the PD\_after compared to PR1\_after and PR2\_after for each subcluster,  
469 only overexpressed genes in the Fibroblasts\_01\_after enriched many cancer-

470 related signaling pathways, indicating that Fibroblasts\_01\_after in the PD\_after  
 471 exhibited a high degree of malignancy (Figure 5J). Combined with the abundance  
 472 after treatment for Fibroblasts\_01\_after (Figure 5A), we thus proposed that  
 473 Fibroblasts\_01\_after cells were the key cells for chemotherapy responses.

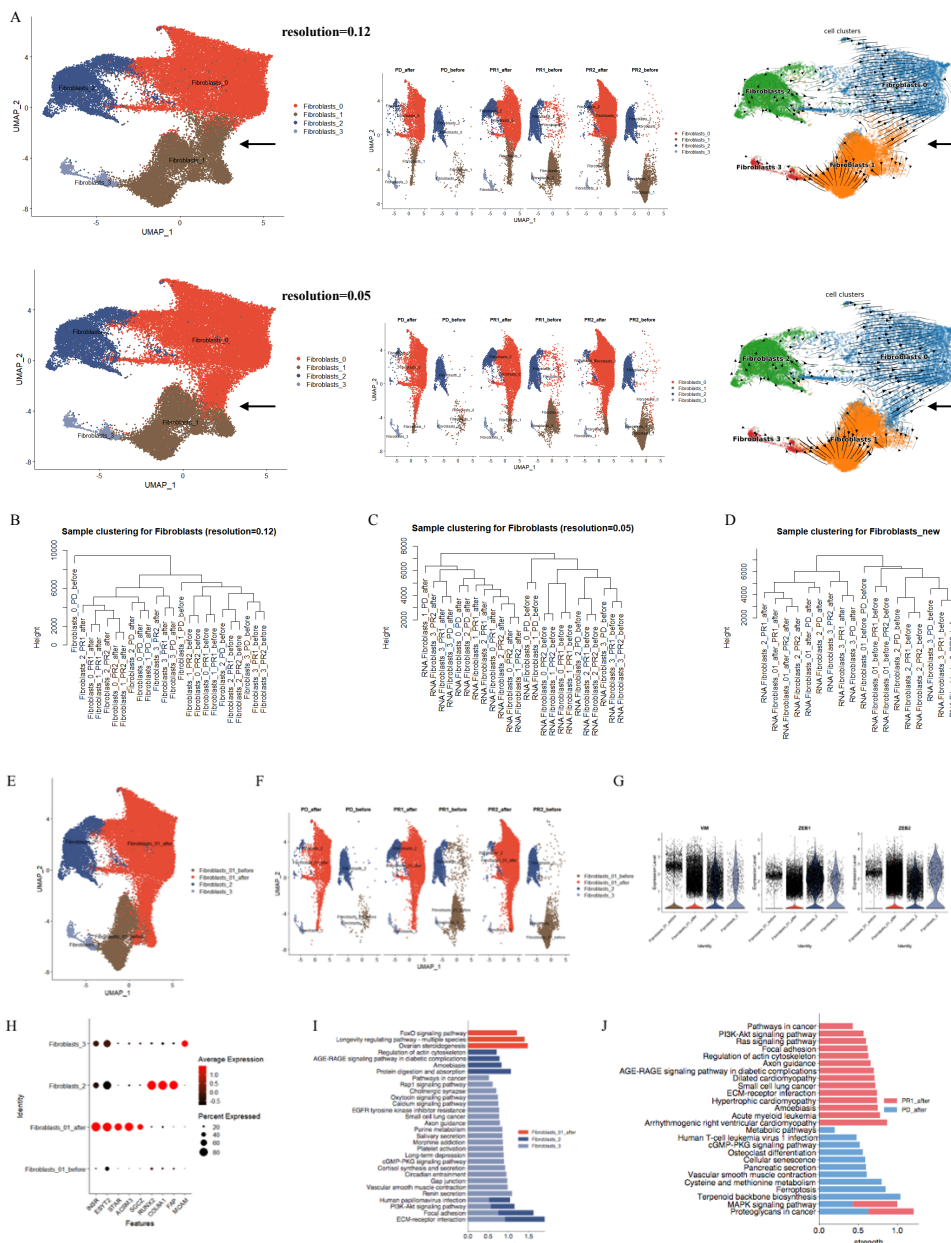

474

475

476 **Figure 5** (A) The UMAP plot of cell atlas for fibroblasts subclusters with different resolutions. Left: the UMAP  
 477 plot of cell atlas for fibroblasts subclusters in integrated samples. Middle: the UMAP plot of cell atlas for  
 478 fibroblasts subclusters in each sample among patients before and after chemotherapy. Right: transcriptional  
 479 dynamic depicted by RNA velocity for each subcluster. (B) Sampling clustering using cellular average  
 480 transcriptional profiles for fibroblasts subclusters under resolution 0.12. (C) Sampling clustering using cellular  
 481 average transcriptional profiles for fibroblasts subclusters under resolution 0.05. (D) Sampling clustering using  
 482 cellular average transcriptional profiles for fibroblasts subclusters after treating Fibroblasts\_0 and Fibroblasts\_1

483 as one subcluster, and differentiated pre-chemotherapy and post-chemotherapy clusters into  
484 Fibroblasts\_01\_before and Fibroblasts\_01\_after. (E) UMAP plot of fibroblast subclusters in integrated samples.  
485 (F) UMAP plot of fibroblast subclusters in each sample from patients before and after chemotherapy. (G) Violin  
486 plots depicting the expression of epithelial-mesenchymal transition (EMT) markers in each subcluster. (H) Dot  
487 plot showing marker gene expression in fibroblast subclusters. (I) KEGG pathway enrichment analysis for  
488 fibroblast subclusters. (J) KEGG pathway enrichment for overexpressed genes in the PD\_after for each subcluster.  
489 PD\_after: Post-chemotherapy sample of the chemoresistant patient. PD\_before: Pre-chemotherapy sample of the  
490 chemoresistant patient. PR1\_after: Post-chemotherapy sample of patient 1 with partial response to chemotherapy.  
491 PR1\_before: Pre-chemotherapy sample of patient 1 with partial response to chemotherapy. PR2\_after: Post-  
492 chemotherapy sample of patient 2 with partial response to chemotherapy. PR2\_before: Pre-chemotherapy sample  
493 of patient 2 with partial response to chemotherapy.

494

495 Gene co-expression networks construction revealed five network modules  
496 for Fibroblasts\_01\_after cells in total (Figure 6A and 6B). The M2 module was  
497 significantly overexpressed in the PD\_after when compared to either PR1\_after  
498 or PR2\_after, indicating its chemoresistance characters (Figure 6C). Protein-  
499 protein network using hub genes of this module that overexpressed in the  
500 PD\_after revealed two subnetworks. One was formed by many cholesterol  
501 biosynthesis-related genes, such as HMGCR, SREBF2, MSMO1, MVD, ACAT2  
502 and INSIG1. The other subnetwork was formed by well-known cancer promoting  
503 genes such as MYC and STAT3 (Figure 6D), and enriched in many cancer-related  
504 pathways such as HIF-1 signaling pathway, insulin resistance, JAK-STAT  
505 signalling pathway, and type II diabetes mellitus.

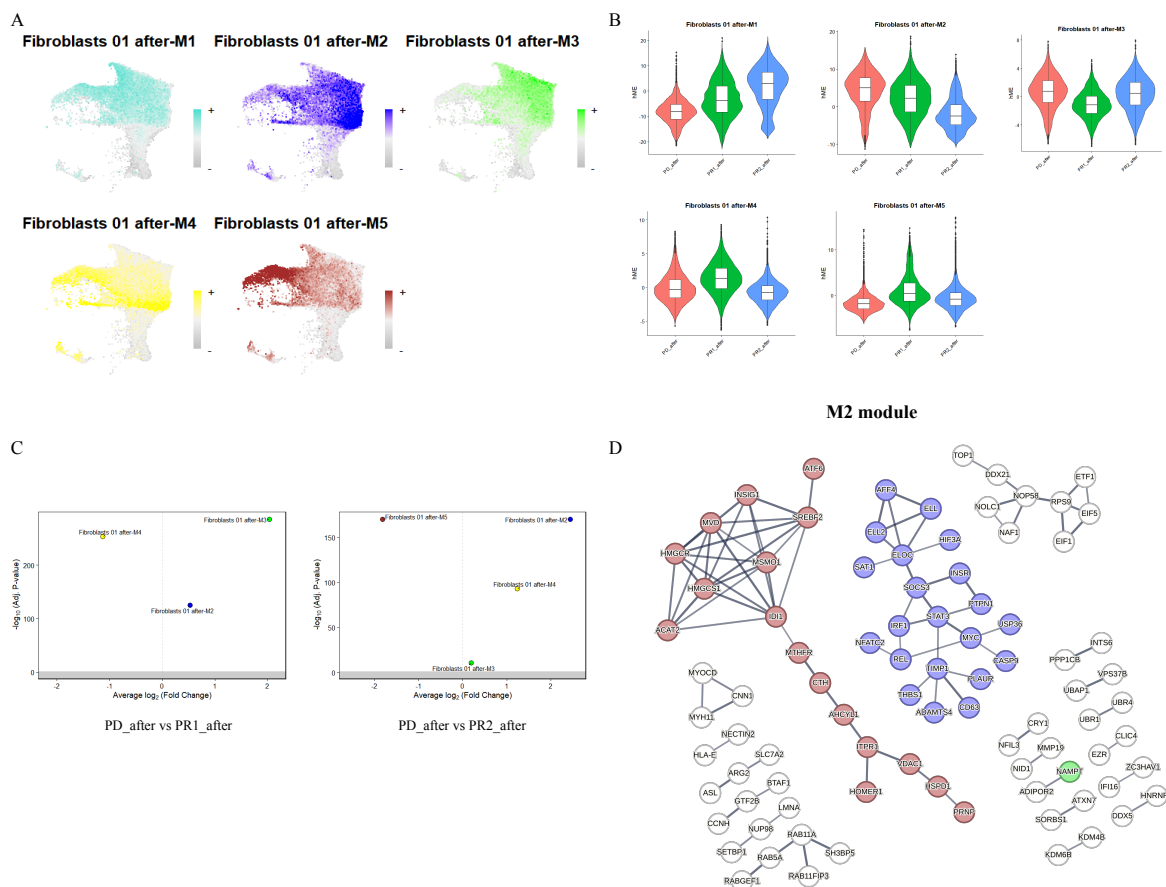

506  
507 **Figure 6** Gene co-expression networks construction and comparisons for Fibroblasts\_01\_after. (A) The UMAP  
508 plots of the hub gene signature score of five modules constructed for Epithelial cells\_0. (B) Violin plots of the  
509 harmonized module eigengenes (hMEs) in each post-treatment sample for each module. (D) Differential module  
510 eigengene comparisons between PD\_after and PR1\_after or PR2\_after, respectively. (E) Co-expression network  
511 visualization using hub genes of Module 2. PD\_after: post-chemotherapy sample of the chemoresistant patient.  
512 PR1\_after: post-chemotherapy sample of the patient 1 with partial response to chemotherapy. PR2\_after: post-  
513 chemotherapy sample of the patient 2 with partial response to chemotherapy.

514  
515 **Other stromal cells and immune cells in the microenvironment were**  
516 **generally tumour-promoting among patients after chemotherapy**

517  
518 We identified four macrophage subclusters (Figure 7), including CD163<sup>+</sup>  
519 M2 macrophages (Macrophages\_0), hypoxic macrophages (Macrophages\_1)  
520 which overexpressed hypoxia-related genes (HK2<sup>+</sup>) (26), RRM2<sup>+</sup> M2  
521 macrophages (Macrophages\_2), and fibrosis-like macrophages (Macrophages\_3)  
522 that overexpressed fibroblast-related genes (PDGFRA<sup>+</sup> and CALD1<sup>+</sup>), consistent  
523 with previous reports of macrophages being capable of transdifferentiating into

524 myofibroblasts (27). Following chemotherapy, a large proportion of  
525 Macrophages\_0 cells and a few Macrophages\_1 cells remained in the PD\_after.  
526 Only 31 genes were found to be overexpressed in the PD\_after compared to  
527 PR1\_after and PR2\_after for Macrophages\_0, and no genes were overexpressed  
528 in the PD\_after for Macrophages\_1.

529

530 Furthermore, we identified five T cell subclusters (Figure 7), including  
531 CD8<sup>+</sup>THEMIS<sup>+</sup> T cells [21,22] (T cells\_0), natural killer (NK) cells  
532 (NCAM1<sup>+</sup>CD3<sup>-</sup>) (28) (T cells\_1), CD4<sup>+</sup> regulatory T cells (Tregs)  
533 (CD4<sup>+</sup>CTLA4<sup>+</sup>FOXP3<sup>+</sup>IL2RA<sup>+</sup>) (29) (T cells\_2), TOP2A<sup>+</sup> T cells (30) (T  
534 cells\_3), and MEG3<sup>+</sup> T cells (31–33) (T cells\_4). The CD8<sup>+</sup> THEMIS<sup>+</sup> T cells  
535 represented a large proportion after treatment. Only 14 genes were found to be  
536 overexpressed in the PD\_after compared to PR1\_after and PR2\_after, and no  
537 specific pathway enrichment was observed. A small proportion of NKT-like cells  
538 remained in the PR1\_after and the PD\_after, with no DE genes identified between  
539 them. These results indicated a generally similar immunosuppressive  
540 microenvironment after chemotherapy among patients.

541

542 Regarding Lymphatic endothelial cells (Figure 1), only four genes were  
543 overexpressed in the PD\_after, including RMST, STAT3, NAMPT, and YBX3.  
544 For Schwann cells (Figure 1), no DE genes were identified among patients after  
545 treatment. Similarly, for Endothelial cells (Figure 1), only 47 DE genes were  
546 found to be overexpressed in the PD\_after compared to PR1\_after and PR2\_after,  
547 such as NAMPT, SEMA3A, RMST, and ATP1B3, and no significantly enriched  
548 pathways were observed. These results indicated that these stromal cells  
549 exhibited generally similar characteristics after chemotherapy among patients.

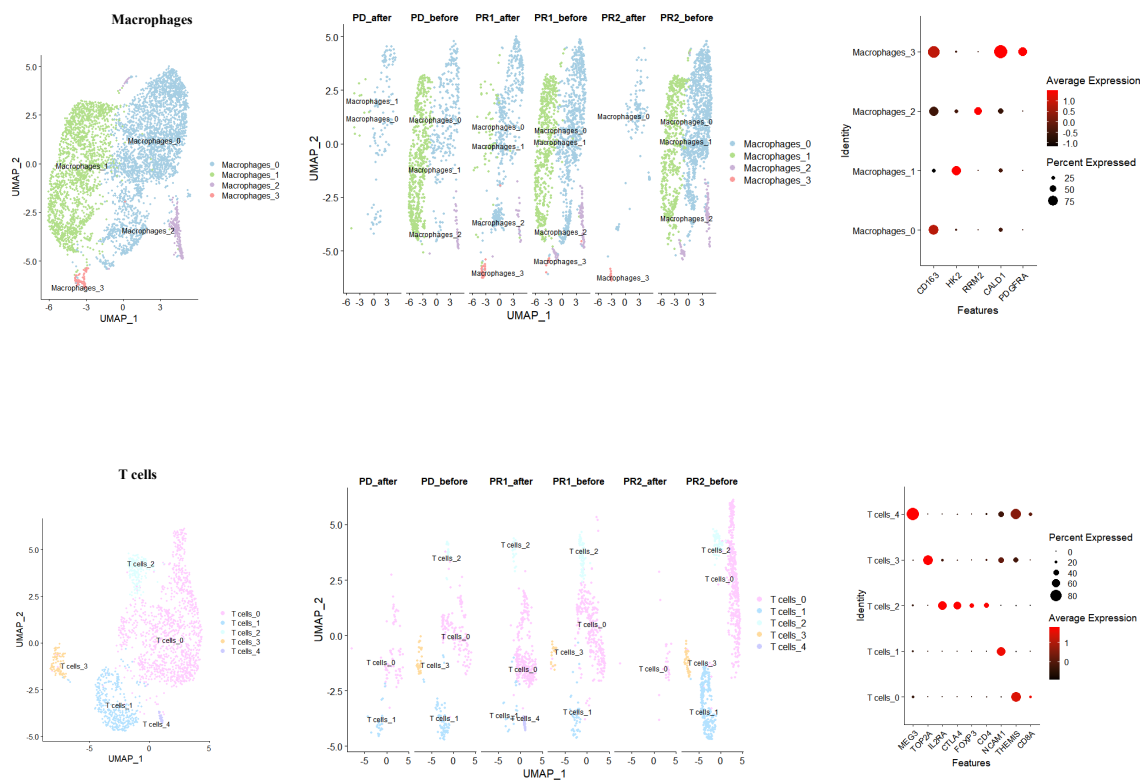

550

551 **Figure 7** (A) Left: UMAP plot of macrophage subclusters for integrated samples. Middle: UMAP plot of  
 552 macrophage subclusters for each sample among patients before and after chemotherapy. Right: Dot plot of marker  
 553 gene expression in each macrophage subcluster. (B) Left: UMAP plot of T cell subclusters for integrated samples.  
 554 Middle: UMAP plot of T cell subclusters for each sample among patients before and after chemotherapy. Right:  
 555 Dot plot of marker gene expression in each T cell subcluster. PD\_after: Post-chemotherapy sample of the  
 556 chemoresistant patient. PD\_before: Pre-chemotherapy sample of the chemoresistant patient. PR1\_after: Post-  
 557 chemotherapy sample of patient 1 with partial response to chemotherapy. PR1\_before: Pre-chemotherapy sample  
 558 of patient 1 with partial response to chemotherapy. PR2\_after: Post-chemotherapy sample of patient 2 with partial  
 559 response to chemotherapy. PR2\_before: Pre-chemotherapy sample of patient 2 with partial response to  
 560 chemotherapy.

561

562 **The NAMPT-INSR was the most prioritized ligand-receptor pair enriched**  
 563 **in the chemoresistance patient**

564

565 Cell-cell interactions play crucial roles in executing cellular functions.  
 566 Since Epithelia cells\_0 cells and Fibroblasts\_01\_after cells were key cells for  
 567 chemoresistance, we thus would like to see which cells interacted with them and



568 affected their core genes expression. The genes that were significantly  
569 overexpressed in Epithelial cells\_0 cells in the PD\_after in M3 and M4 modules  
570 we identified above were used as the target geneset when Epithelial cells\_0 cells  
571 were as the receivers. Similarly, the genes that were significantly overexpressed  
572 in Fibroblasts\_01\_after cells in the PD\_after in M2 module we identified above  
573 were used as the target genesets when Fibroblasts\_01\_after cells were as the  
574 receivers.

575

576 Interestingly, results consistently showed that the NAMPT-INSR was the  
577 most prioritized ligand-receptor pair for cells interacting with Epithelial cells\_0  
578 cells (receiver cells) in the PD\_after when compared to PR1\_after and PR2\_after.  
579 For example, INSR was the most potentially interacted receptor for NAMPT for  
580 Fibroblasts\_01\_after cells (sender) interacting with Epithelial cells\_0 cells  
581 (receiver) in the PD\_after compared to PR1\_after (Figure 8A left) and PR2\_after  
582 (Figure 8B left). NAMPT was the only ligand with high ranking for ligand  
583 activity, and also with high expression level in Fibroblasts\_01\_after in the  
584 PD\_after compared to PR1\_after (Figure 8A right) and PR2\_after (Figure 8B  
585 right). The corresponding downstream target genes were IL1R and INSR in the  
586 PD\_after compared to PR1 (Figure 8A right) and PR2 (Figure 8B right). These  
587 results were also applied to other cells interacting with Epithelial cells\_0 cells in  
588 the PD\_after to drive the overexpression of IL1R and INSR as the downstream  
589 genes, such as Endothelial cells, Fibroblasts\_2, Fibroblasts\_3, Lymphatic  
590 endothelial cells, and T cells\_0, which were given in the Supplementary File 3.

591

592 The NAMPT-INSR was also the most prioritized ligand-receptor pair for  
593 cells interacting with Fibroblasts\_01\_after cells (receiver) in the PD\_after when  
594 compared to PR1\_after and PR2\_after, with MYC and INSR itself as the  
595 downstream target genes, such as Fibroblasts\_3 and Lymphatic endothelial cells  
596 (Figure 8C and 8D, Supplementary File 3).

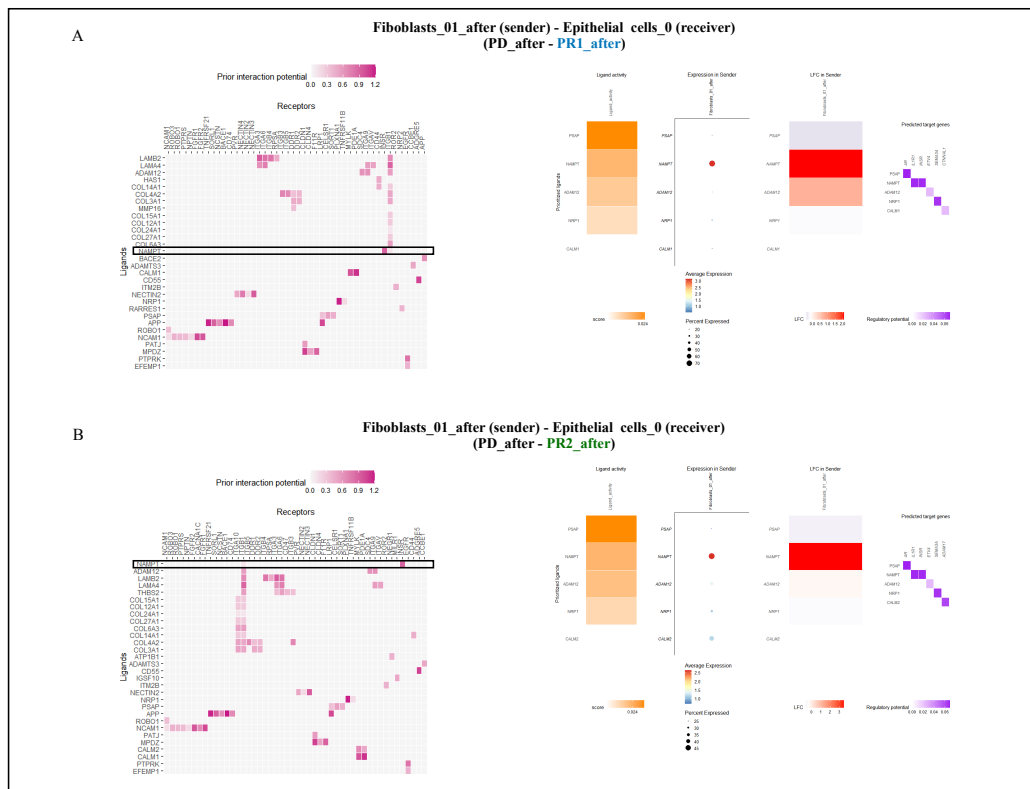

597

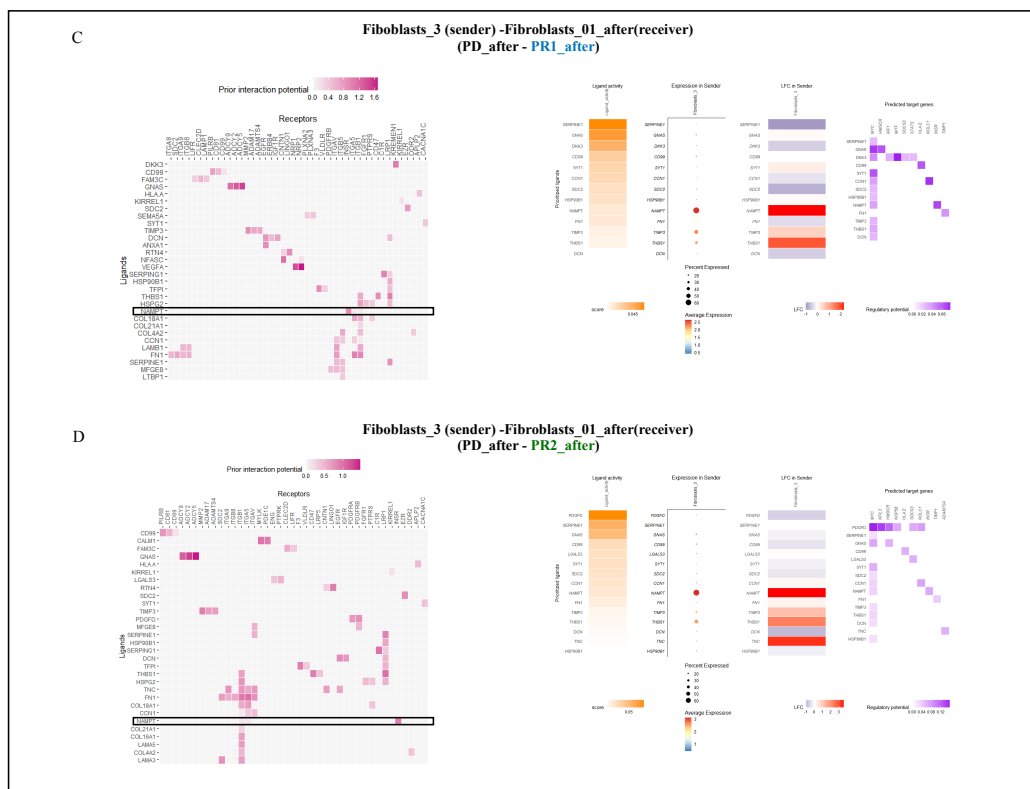

598

599

600

601

602

603

**Figure 8** Cell-cell interactions analyses. (A) Ligand-receptor inference (left) and target genes inference (right) when Fibroblasts\_01\_after cells acted as senders and interacted with Epithelial\_cells\_0 cells as receivers in the PD\_after compared to PR1\_after. The NAMPT-INSR was the most prioritized ligand receptor pair, with IL1R and INSR itself as the downstream target genes. (B) Ligand-receptor inference (left) and target genes inference (right) when Fibroblasts\_01\_after cells acted as senders and interacted with Epithelial\_cells\_0 cells as receivers

604 in the PD\_after compared to PR2\_after. The NAMPT-INSR was the most prioritized ligand receptor pair, with  
605 IL1R and INSR itself as the downstream target genes. (C) Ligand-receptor inference (left) and target genes  
606 inference (right) when Fibroblasts\_3 cells acted as senders and interacted with Fibroblasts\_01\_after cells as  
607 receivers in the PD\_after compared to PR1\_after. The NAMPT-INSR was the most prioritized ligand receptor  
608 pair, with MYC and INSR itself as the downstream target genes. (D) Ligand-receptor inference (left) and target  
609 genes inference (right) when Fibroblasts\_3 cells acted as senders and interacted with Fibroblasts\_01\_after cells  
610 as receivers in the PD\_after compared to PR2\_after. The NAMPT-INSR was the most prioritized ligand receptor  
611 pair, with MYC and INSR itself as the downstream target genes. PD\_after: Post-chemotherapy sample of the  
612 chemoresistant patient. PR1\_after: Post-chemotherapy sample of patient 1 with partial response to chemotherapy.  
613 PR2\_after: Post-chemotherapy sample of patient 2 with partial response to chemotherapy.

614

## 615 **Discussion**

616 In this study, we revealed that chemoresistant cancer cells were pre-  
617 existing in individual patients prior to treatment. This observation aligns with  
618 existing research that cancer cells are often clustered by patient IDs, highlighting  
619 the strong individual differences among cancer cells (34,35), which can  
620 contribute to the heterogeneity of tumors in individual patients. These results  
621 provide a foundation for developing biomarkers to diagnose chemoresistance  
622 before initiating treatment. We identified BMP1 and TPM2 as promising  
623 universal candidate biomarkers for identifying chemoresistant patients before  
624 treatment when using bulk transcriptome data. Both genes can facilitate  
625 chemoresistance (36,37), supporting the rationality of our analyses.

626

627 We found two co-expression network modules were significantly  
628 overexpressed in Epithelial cells\_0 cells in the chemoresistant sample. One  
629 network was formed with hub genes such as ESR1 and CTNNB1. The other  
630 module network was formed by tight connections among genes of IGF1R and  
631 INSR, AR, NCOR2 and SMAD2. CTNNB1 has been suggested as a potential  
632 biomarker for chemoresistance in breast cancer (38), which can be a good  
633 candidate therapeutic target for chemoresistance in HGSOC. Notably, two  
634 hormone-related genes, ESR1 and AR, were involved in these core networks.  
635 Hormone imbalance can contribute to the development of ovarian cancer, and

636 both androgen and estrogen have been reported to regulate proliferation and  
637 progression in ovarian cancer (39,40). Our findings here thus highlight the critical  
638 roles of these hormones in chemoresistance in HGSOC which deserve  
639 consideration. Additionally, two hub genes are insulin receptors (IGF1R and  
640 INSR). The enrichment of insulin resistance pathway in Epithelial cells\_0 cells  
641 in the chemoresistant sample further supports the potential link between insulin  
642 and early chemoresistance. Insulin is well-known for cellular metabolism and  
643 growth (41). It is known that chemotherapy-induced insulin resistance can impair  
644 anti-cancer efficacy (42). Elevated circulating insulin due to insulin resistance,  
645 coupled with overexpressed insulin receptors in cancer cells can confer a  
646 selective advantage to promote proliferation and migration (43,44), and thus  
647 contributing to chemoresistance in HGSOC. Our findings thus underscore the  
648 importance of insulin-related genes in early chemoresistance in HGSOC.

649

650 In addition to cancer cells, other cells in the tumor microenvironment can  
651 also play crucial roles in chemotherapy responses. Unlike the pre-existing cancer  
652 cells, our findings indicated that the induced fibroblasts (Fibroblasts\_01\_after)  
653 following chemotherapy were key cells associated with chemoresistance. A  
654 subnetwork formed by cholesterol biosynthesis-related genes was found in the  
655 module that was significantly overexpressed in Fibroblasts\_01\_after cells in the  
656 chemoresistant sample. Cholesterol biosynthesis can support cancer progression  
657 and also induce drug resistance (45). For example, gene SREBF2 has been  
658 reported to facilitate chemoresistance in ovarian cancer (46). Our results thus  
659 implies the importance of cholesterol metabolism in chemoresistance in HGSOC.  
660 Another subnetwork was formed by cancer-related genes such as STAT3 and  
661 MYC. The overexpression of both genes have well been linked to  
662 chemoresistance in ovarian cancer (47,48). Genes within these subnetworks  
663 could have critical roles in chemoresistance and are good candidate targets.

664

665 Cellular interactions in the tumor microenvironment are vital for  
666 chemoresistance. Our analysis revealed that the NAMPT-INSR was the most  
667 prioritized ligand-receptor pair enriched in the chemoresistant sample when cells  
668 interacting with the two key cell types, i.e. Epithelial cells\_0 and  
669 Fibroblasts\_01\_after. NAMPT as a rate-limiting enzyme for NAD synthesis, is  
670 required for cellular metabolism and DNA repair, for example, as the substrate  
671 of PARPs (a DNA repair enzyme whose inhibitors are widely used in second-line  
672 therapy for HGSOC) (49). Recent studies have highlighted the potential function  
673 of NAMPT as an alternative ligand for INSR (50), which can enhance insulin  
674 resistance (51), which can impair anti-cancer efficacy as we mentioned above.  
675 Besides, similar to insulin, NAMPT can stimulate glucose uptake and  
676 proliferation through INSR to confer a selective advantage to promote  
677 proliferation and migration of cancer cells as we mentioned above. Moreover,  
678 NAMPT treatment can induce fibrosis by overproducing profibrotic molecules  
679 through the INSR transduction pathway (51). This can contribute to  
680 chemoresistance by creating a physical barrier to protect from chemotherapeutic  
681 drugs (52). All these findings gave strong supports for the involvement of  
682 NAMPT-INSR in chemoresistance in HGSOC patients. We further identified that  
683 IL1R1, MYC and INSR were the downstream target genes of NAMPT-INSR.  
684 MYC and INSR can induced chemoresistance as we mentioned above. The  
685 chemoresistant functions of these target genes gave further support that NAMPT-  
686 INSR can have critical roles in chemoresistance in HGSOC patients, although the  
687 specific mechnism involved in HGSOC needs further investigation.

688  
689 Notably, NAMPT was overexpressed in Fibroblasts\_01\_after cells only  
690 after chemotherapy. This aligns with previous findings about the overexpression  
691 of NAMPT at the onset of drug resistance (53). NAMPT can be induced by  
692 hypoxia via a STAT3-dependent mechanism (54). Additionally, MYC can  
693 interact with the NAMPT promoter and stimulate its expression to promote

694 cancer (55,56). The overexpression of both STAT3 and MYC in the PD\_after in  
695 Fibroblasts\_01\_after cells in our study can help explain the overexpression of  
696 NAMPT in these cells after chemotherapy. Our cellular interactions analyses  
697 showed that MYC was also the downstream target gene of NAMPT in  
698 Fibroblasts\_01\_after in the PD\_after. Indeed, MYC and NAMPT are involved in  
699 a positive feedback loop to drive tumorigenesis (56). The consistent results  
700 supported the reliability of our analyses.

701  
702 The immune microenvironment in patients with varying chemotherapy  
703 responses exhibited a general trend of being inhibited and proinflammatory after  
704 chemotherapy. The proportions of T cells, both before and after chemotherapy,  
705 were observed to be small, which aligns with the characteristic of ovarian cancer  
706 being a “cold” tumor (57). Notably, Ciliated-secretory intermediate cells  
707 displayed a close transcriptional profile with Epithelial cells\_0 cells in the  
708 PD\_after, consistent with the hypothesis that they are the primary origin of  
709 HGSOC, originating from the fallopian tube and fall off to the ovary (24,25).  
710 Although other stromal cells showed minimal differences in gene expression  
711 among samples after chemotherapy, the majority of them exhibited  
712 overexpression of NAMPT in the chemoresistant patient. This is in line with the  
713 findings that the NAMPT-INSR pair was highly enriched when these stromal  
714 cells interacted with Fibroblasts\_01\_after cells and Epithelial cells\_0 cells in the  
715 chemoresistant patient (Supplementary File 3).

716

## 717 **Conclusions**

718 In conclusion, we found that pre-existing cancer cells and induced  
719 fibroblasts as key contributors for early chemoresistance in HGSOC patients.  
720 Metabolism reprogramming, involving hormone-related genes (ESR1 and AR),  
721 insulin-related genes (IGF1R and INSR) and cholesterol biosynthesis-related  
722 genes, could play critical roles in early chemoresistant HGSOC. CTNNB1,

723 STAT3 and MYC as core hub genes are also good candidate chemoresistant  
724 targets. The NAMPT-INSR ligand-receptor pair enriched for cells interacted with  
725 Fibroblasts\_01\_after cells and Epithelial cells\_0 cells, can be important for early  
726 chemoresistance in HGSOC.

727

728 We thus propose that the combination of chemotherapy with INSR  
729 inhibitors and NAMPT inhibitors could represent a promising treatment strategy  
730 for early chemoresistant HGSOC patients. The inhibitors of NAMPT and INSR  
731 have undergone extensive development and clinical testing (58,59). Previous  
732 research has demonstrated that the combination of a NAMPT inhibitor and  
733 chemotherapy resulted in a better prognosis than chemotherapy alone in mice  
734 with HGSOC (60), holds promise for further improving the therapeutic window.  
735 Despite the limitations in sample size, our study has yielded valuable clinic  
736 findings, enrich the heterogeneous library of HGSOC and could offer important  
737 insights into potential clinical biomarkers and therapeutic targets for HGSOC  
738 chemoresistance. The findings from our study may also contribute to  
739 advancements in understanding and addressing chemoresistance in various  
740 cancer types in a broad sense.

741

## 742 **Acknowledgments**

743 We thank the valuable suggestions from Yunfei Zhao and Prof. Canwei  
744 Xia. We also would like to acknowledge the computer support provided by Prof.  
745 Yang Liu, Yuqing Han, and Ximin He.

746

## 747 **Funding**

748 This study was supported by the National Key R&D Program of China  
749 (2022YFC2704200), the National Natural Science Foundation of China  
750 (81903037), the Natural Science Foundation of Guangdong Province, China  
751 (2020A1515011281), and the Nature Science Foundation of China

752 (No.81772769). Part of the data computation was supported by National  
753 Supercomputer Center in Guangzhou, China.

754

### 755 **Authors contributions**

756 Langyu Gu and Guofen Yang proposed the study. Langyu Gu conducted  
757 the single nuclei transcriptome data analyses. Shasha He and Yu Zeng conducted  
758 chemotherapy responses evaluation. Linxiang Wu proposed the sampling plan  
759 and provided the clinical information. Guofen Yang, Hongwei Shen, and  
760 Linxiang Wu conducted the sampling. Langyu Gu, Yang Zhang, Chuling Wu,  
761 and Huishan Xu conducted survival analyses. Langyu Gu, Chenqing Zheng, and  
762 Xiaoyan Zhang conducted pathways enrichment analyses. Guofen Yang, Yufeng  
763 Ren, Shasha He, and Shuzhong Yao provided funding supports. Langyu Gu wrote  
764 the manuscript, with all authors providing comments and approval.

765

### 766 **References**

- 767 1. Armstrong DK, Alvarez RD, Bakkum-Gamez JN, Barroilhet L, Behbakht K, Berchuck  
768 A, et al. NCCN Guidelines Insights: Ovarian Cancer, Version 1.2019. *J Natl Compr*  
769 *Canc Netw*. 2019;17:896–909.
- 770 2. Jayson GC, Kohn EC, Kitchener HC, Ledermann JA. Ovarian cancer. *Lancet* (London,  
771 England). 2014;384:1376–88.
- 772 3. Gonzalez Bosquet J, Newton AM, Chung RK, Thiel KW, Ginader T, Goodheart MJ, et  
773 al. Prediction of chemo-response in serous ovarian cancer. *Mol Cancer*. 2016;15:66.
- 774 4. Kim C, Gao R, Sei E, Brandt R, Hartman J, Hatschek T, et al. Chemoresistance  
775 Evolution in Triple-Negative Breast Cancer Delineated by Single-Cell Sequencing. *Cell*.  
776 2018;173:879–93.e13.
- 777 5. Qin P, Chen H, Wang Y, Huang L, Huang K, Xiao G, et al. Cancer-associated fibroblasts  
778 undergoing neoadjuvant chemotherapy suppress rectal cancer revealed by single-cell  
779 and spatial transcriptomics. *Cell Rep Med*. 2023;4:101231.
- 780 6. Sharma A, Cao EY, Kumar V, Zhang X, Leong HS, Wong AML, et al. Longitudinal  
781 single-cell RNA sequencing of patient-derived primary cells reveals drug-induced  
782 infidelity in stem cell hierarchy. *Nat Commun*. 2018;9:4931.
- 783 7. Zhang K, Erkan EP, Jamalzadeh S, Dai J, Andersson N, Kaipio K, et al. Longitudinal  
784 single-cell RNA-seq analysis reveals stress-promoted chemoresistance in metastatic  
785 ovarian cancer. *Sci Adv*. 2022;8:eabm1831.
- 786 8. Lindemann K, Gao B, Mapagu C, Fereday S, Emmanuel C, Alsop K, et al. Response  
787 rates to second-line platinum-based therapy in ovarian cancer patients challenge the  
788 clinical definition of platinum resistance. *Gynecol Oncol*. 2018;150.
- 789 9. Joo Hyun O, Lodge MA, Wahl RL. Practical perclist: A simplified guide to PET response  
790 criteria in solid tumors 1.0. *Radiology*. 2016;280.



- 791 10. Hao Y, Hao S, Andersen-Nissen E, Mauck WM, Zheng S, Butler A, et al. Integrated  
792 analysis of multimodal single-cell data. *Cell*. 2021;184:3573–87.
- 793 11. McGinnis CS, Murrow LM, Gartner ZJ. DoubletFinder: Doublet Detection in Single-  
794 Cell RNA Sequencing Data Using Artificial Nearest Neighbors. *Cell Sys*. 2019;8:329–  
795 37.
- 796 12. Szklarczyk D, Kirsch R, Koutrouli M, Nastou K, Mehryary F, Hachilif R, et al. The  
797 STRING database in 2023: protein-protein association networks and functional  
798 enrichment analyses for any sequenced genome of interest. *Nucleic Acids Res*.  
799 2023;51:D638–46.
- 800 13. Gao R, Bai S, Henderson YC, Lin Y, Schalck A, Yan Y, et al. Delineating copy number  
801 and clonal substructure in human tumors from single-cell transcriptomes. *Nat*  
802 *Biotechnol*. 2021;39:599–608.
- 803 14. Morabito S, Reese F, Rahimzadeh N, Miyoshi E, Swarup V. hdWGCNA identifies co-  
804 expression networks in high-dimensional transcriptomics data. *Cell Reports Methods*.  
805 2023; 3:100498.
- 806 15. Therneau T, Grambsch P. *Modeling Survival Data: Extending the Cox Model*. Springer,  
807 New York; 2000.
- 808 16. Kim D, Paggi JM, Park C, Bennett C, Salzberg SL. Graph-based genome alignment and  
809 genotyping with HISAT2 and HISAT-genotype. *Nat Biotechnol*. 2019;37:907–15.
- 810 17. Li H, Handsaker B, Wysoker A, Fennell T, Ruan J, Homer N, et al. The Sequence  
811 Alignment/Map format and SAMtools. *Bioinformatics*. 2009;25:2078–9.
- 812 18. Li H, Handsaker B, Wysoker A, Fennell T, Ruan J, Homer N, et al. The Sequence  
813 Alignment / Map (SAM) Format and SAMtools 1000 Genome Project Data Processing  
814 Subgroup. *Bioinformatics*. 2009; 25:2078-9.
- 815 19. Liao Y, Smyth GK, Shi W. FeatureCounts: An efficient general purpose program for  
816 assigning sequence reads to genomic features. *Bioinformatics*. 2014;30:923-930.
- 817 20. Love MI, Huber W, Anders S. Moderated estimation of fold change and dispersion for  
818 RNA-seq data with DESeq2. *Genome Biol*. 2014;15:550.
- 819 21. Gautier L, Cope L, Bolstad BM, Irizarry RA. Affy - Analysis of Affymetrix GeneChip  
820 data at the probe level. *Bioinformatics*. 2004;20:307-315.
- 821 22. Browaeys R, Saelens W, Saeys Y. NicheNet: modeling intercellular communication by  
822 linking ligands to target genes. *Nat Methods*. 2020;17:159–62.
- 823 23. Bergen V, Lange M, Peidli S, Wolf FA, Theis FJ. Generalizing RNA velocity to  
824 transient cell states through dynamical modeling. *Nat Biotechnol*. 2020;38:1408–14.
- 825 24. Hu Z, Artibani M, Alsaadi A, Wietek N, Morotti M, Shi T, et al. The Repertoire of  
826 Serous Ovarian Cancer Non-genetic Heterogeneity Revealed by Single-Cell Sequencing  
827 of Normal Fallopian Tube Epithelial Cells. *Cancer Cell*. 2020;37:226–42.
- 828 25. Dinh HQ, Lin X, Abbasi F, Nameki R, Haro M, Olingy CE, et al. Single-cell  
829 transcriptomics identifies gene expression networks driving differentiation and  
830 tumorigenesis in the human fallopian tube. *Cell Rep*. 2021;35:108978.
- 831 26. Riboldi E, Porta C, Morlacchi S, Viola A, Mantovani A, Sica A. Hypoxia-mediated  
832 regulation of macrophage functions in pathophysiology. *Int Immunol*. 2013;25:67–75.
- 833 27. Tang PC-T, Chung JY-F, Xue VW-W, Xiao J, Meng X-M, Huang X-R, et al. Smad3  
834 Promotes Cancer-Associated Fibroblasts Generation via Macrophage-Myofibroblast  
835 Transition. *Adv Sci*. 2022;9:e2101235.
- 836 28. Väyrynen JP, Haruki K, Lau MC, Väyrynen SA, Ugai T, Akimoto N, et al. Spatial  
837 Organization and Prognostic Significance of NK and NKT-like Cells via Multimarker  
838 Analysis of the Colorectal Cancer Microenvironment. *Cancer Immunol Res* .  
839 2022;10:215–27.
- 840 29. Sakaguchi S, Mikami N, Wing JB, Tanaka A, Ichiyama K, Ohkura N. Regulatory T

- 841 Cells and Human Disease. *Annu Rev Immunol.* 2020;38:541–66.
- 842 30. Li Y, Wang Z, Han F, Zhang M, Yang T, Chen M, et al. Single-cell transcriptome  
843 analysis profiles cellular and molecular alterations in submandibular gland and blood in  
844 IgG4-related disease. *Ann Rheum Dis.* 2023;82:1348–58.
- 845 31. Li J-Q, Hu S-Y, Wang Z-Y, Lin J, Jian S, Dong Y-C, et al. Long non-coding RNA  
846 MEG3 inhibits microRNA-125a-5p expression and induces immune imbalance of  
847 Treg/Th17 in immune thrombocytopenic purpura. *Biomed Pharmacother.* 2016;83:905–  
848 11.
- 849 32. Qiu Y-Y, Wu Y, Lin M-J, Bian T, Xiao Y-L, Qin C. LncRNA-MEG3 functions as a  
850 competing endogenous RNA to regulate Treg/Th17 balance in patients with asthma by  
851 targeting microRNA-17/ ROR $\gamma$ t. *Biomed Pharmacother.* 2019;111:386–94.
- 852 33. Wang J, Liu X, Hao C, Lu Y, Duan X, Liang R, et al. MEG3 modulates TIGIT  
853 expression and CD4 + T cell activation through absorbing miR-23a. *Mol Cell Biochem.*  
854 2019;454:67–76.
- 855 34. Wu F, Fan J, He Y, Xiong A, Yu J, Li Y, et al. Single-cell profiling of tumor  
856 heterogeneity and the microenvironment in advanced non-small cell lung cancer. *Nat*  
857 *Commun.* 2021;12:2540.
- 858 35. Izar B, Tirosh I, Stover EH, Wakiro I, Cuoco MS, Alter I, et al. A single-cell landscape  
859 of high-grade serous ovarian cancer. *Nat Med.* 2020;26:1271–9.
- 860 36. Zhang J, Zhang J, Xu S, Zhang X, Wang P, Wu H, et al. Hypoxia-Induced TPM2  
861 Methylation is Associated with Chemoresistance and Poor Prognosis in Breast Cancer.  
862 *Cell Physiol Biochem.* 2018;45:692–705.
- 863 37. Xie F, Zhang D, Qian X, Wei H, Zhou L, Ding C, et al. Analysis of cancer-promoting  
864 genes related to chemotherapy resistance in esophageal squamous cell carcinoma. *Ann*  
865 *Transl Med.* 2022;10:92.
- 866 38. Ozcan G. PTCH1 and CTNNB1 emerge as pivotal predictors of resistance to  
867 neoadjuvant chemotherapy in ER+/HER2- breast cancer. *Front Oncol.*  
868 2023;13:1216438.
- 869 39. Chung WM, Chen L, Chang WC, Su SY, Hung YC, Ma WL. Androgen/androgen  
870 receptor signaling in ovarian cancer: Molecular regulation and therapeutic potentials.  
871 *Int. J. Mol. Sci.* 2021; 22:7748.
- 872 40. Rothenberger NJ, Somasundaram A, Stabile LP. The role of the estrogen pathway in the  
873 tumor microenvironment. *Int. J. Mol. Sci.* 2018; 19:611.
- 874 41. Le TKC, Dao XD, Nguyen DV, Luu DH, Bui TMH, Le TH, et al. Insulin signaling and  
875 its application. *Front. Endocrinol. (Lausanne).* 2023; 14:1226655.
- 876 42. Ariaans G, de Jong S, Gietema JA, Lefrandt JD, de Vries EGE, Jalving M. Cancer-drug  
877 induced insulin resistance: innocent bystander or unusual suspect. *Cancer Treat Rev.*  
878 2015;41:376–84.
- 879 43. Vigneri R, Sciacca L, Vigneri P. Rethinking the Relationship between Insulin and  
880 Cancer. *Trends Endocrinol Metab.* 2020;31:551–60.
- 881 44. Belfiore A, Malaguarnera R. Insulin receptor and cancer. *Endocr Relat Cancer.*  
882 2011;18:R125–47.
- 883 45. Huang B, Song B liang, Xu C. Cholesterol metabolism in cancer: mechanisms and  
884 therapeutic opportunities. *Nat. Metab.* 2020; 2:132-141.
- 885 46. Zheng L, Li L, Lu Y, Jiang F, Yang X-A. SREBP2 contributes to cisplatin resistance in  
886 ovarian cancer cells. *Exp Biol Med (Maywood).* 2018;243:655–62.
- 887 47. Sun J, Cai X, Yung MM, Zhou W, Li J, Zhang Y, et al. miR-137 mediates the functional  
888 link between c-Myc and EZH2 that regulates cisplatin resistance in ovarian cancer.  
889 *Oncogene.* 2019;38:564–80.
- 890 48. Gong K, Dong Y, Wang L, Duan Y, Yu J, Sun Y, et al. Nanoparticle overcomes

- 891 sphingosine-1-phosphate receptor-1-mediated chemoresistance through inhibiting  
892 s1pr1/ p-stat3 axis in ovarian carcinoma. *Int J Nanomedicine*. 2020; 15:5561-5571.
- 893 49. Sociali G, Raffaghello L, Magnone M, Zamporlini F, Emionite L, Sturla L, et al.  
894 Antitumor effect of combined NAMPT and CD73 inhibition in an ovarian cancer model.  
895 *Oncotarget*. 2016;7:2968–84.
- 896 50. Peng Q, Jia SH, Parodo J, Ai Y, Marshall JC. Pre-B cell colony enhancing factor induces  
897 Nampt-dependent translocation of the insulin receptor out of lipid microdomains in  
898 A549 lung epithelial cells. *Am J Physiol Endocrinol Metab*. 2015;308:E324–33.
- 899 51. Song HK, Lee MH, Kim BK, Park YG, Ko GJ, Kang YS, et al. Visfatin: a new player  
900 in mesangial cell physiology and diabetic nephropathy. *Am J Physiol Renal Physiol*.  
901 2008;295:F1485–94.
- 902 52. Tajaldini M, Poorkhani A, Amiriani T, Amiriani A, Javid H, Aref P, et al. Strategy of  
903 targeting the tumor microenvironment via inhibition of fibroblast/fibrosis remodeling  
904 new era to cancer chemo-immunotherapy resistance. *Eur J Pharmacol*.  
905 2023;957:175991.
- 906 53. Shackelford RE, Mayhall K, Maxwell NM, Kandil E, Coppola D. Nicotinamide  
907 Phosphoribosyltransferase in Malignancy: A Review. *Genes and Cancer*. 2013; 4:447-  
908 56.
- 909 54. Shackelford RE, Bui MM, Coppola D, Hakam A. Over-expression of nicotinamide  
910 phosphoribosyltransferase in ovarian cancers. *Int J Clin Exp Pathol*. 2010;3:522–7.
- 911 55. Wei Y, Xiang H, Zhang W. Review of various NAMPT inhibitors for the treatment of  
912 cancer. *Front Pharmacol*. 2022;13:970553.
- 913 56. Menssen A, Hydbring P, Kapelle K, Vervoorts J, Diebold J, Lüscher B, et al. The c-  
914 MYC oncoprotein, the NAMPT enzyme, the SIRT1-inhibitor DBC1, and the SIRT1  
915 deacetylase form a positive feedback loop. *Proc Natl Acad Sci U S A*. 2012;109:E187–  
916 96.
- 917 57. Majidpoor J, Mortezaee K. The efficacy of PD-1/PD-L1 blockade in cold cancers and  
918 future perspectives. *Clin Immunol*. 2021;226:108707.
- 919 58. Tang H, Wang L, Wang T, Yang J, Zheng S, Tong J, et al. Recent advances of targeting  
920 nicotinamide phosphoribosyltransferase (NAMPT) for cancer drug discovery. *Eur J*  
921 *Med Chem*. 2023;258:115607.
- 922 59. Zhang X, Zhu X, Bi X, Huang J, Zhou L. The Insulin Receptor: An Important Target  
923 for the Development of Novel Medicines and Pesticides. *Int J Mol Sci*. 2022; 23:7793.
- 924 60. Nacarelli T, Fukumoto T, Zundell JA, Fatkhutdinov N, Jean S, Cadungog MG, et al.  
925 NAMPT Inhibition Suppresses Cancer Stem-like Cells Associated with Therapy-  
926 Induced Senescence in Ovarian Cancer. *Cancer Res*. 2020;80:890–900.
- 927
